# Supplementary material
Source: Royal Society of Chemistry journal article supplement (doi:10.1039/d6se00105j)
Supplement: d6se00105j1.pdf [file d6se00105j1.pdf]

## Supplementary Materials

### Techno-Economic and Uncertainty Analysis of an Integrated Solar-Hydrogen Energy System for Institutional Decarbonization in Bangladesh

Mohammad Sohel<sup>1</sup>, Yasir Arafat<sup>1\*</sup>, Md. Zahid Hasan<sup>1</sup>

<sup>1\*</sup> Department of Electrical and Electronic Engineering, International Islamic University  
Chittagong, Chattogram-4318, Bangladesh

*\*Correspondence to:*

**ya\_eee@iiuc.ac.bd (Dr. Yasir Arafat)**

**zahidhasan.02@gmail.com (Md. Zahid Hasan)**

*This Supplementary Materials document contains the following supporting information.*

### **Figures of Content**

Figure S1: Diagram of LCA System Boundary (Referee 1 comment no 2 also Referee 2 comment no 2)

Figure S2: EMS flowchart

Figure S3(a): 24 hours EMS dispatch profile for summer, monsoon, and winter cases depicting PV power generation, electrolysis plant operation, hydrogen storage, and grid interfacing.

Figure S3(b): Annual simulation (8,760 hours) of the IIUC solar-hydrogen system for PV-load matching, EMS scheduling, hydrogen storage variation, grid interfacing, and monthly hydrogen production.

### **Tables of content**

Table S1(a): List of Nomenclature

Table S1(b): List of Abbreviations

Table S2: Summary of table S2(a) & S2(b)

Table S2(a): System Boundary Declaration for Life Cycle Assessment (Referee 1 comment no 2 and Referee 2 comment no 2)

Table S2(b): Life Cycle Inventory: All Emission Factors and their Source (Referee 1 comment no 2 and Referee 2 comment no 2)

Table S3: Sensitivity Analysis of LCA: Four Scenarios (Referee 1 comment no 2 and Referee 2 comment no 1)

Table S3(a). Performance Parameters of Components (International Benchmark vs. Bangladesh Tropical Climatic Adjustments):

Table S4: CAPEX/OPEX Localization Scenarios for Bangladesh (Referee 1 comment no 3)

Table S4(a): Summary of LCOH by Scenarios

Table S5: Cost Schedule of Component Replacement and Degradation (Referee 1 comment no 4 and Referee 2 comment no 1)

Table S6: EMS Control Parameters (Referee 1 comment no 5 and Referee 2 comment no 5)

Table S7. Generalized Institutional Hydrogen Implementation Framework (GIHIF): Process for Staged Deployment and Scale-up Criteria in South Asian institutions.

The Figure S1 illustrates the cradle-to-grave system boundary of ISO 14044:2006 for the solar-hydrogen integration plant installed at IIUC, Chittagong, Bangladesh. The specifications of the diagram are given below for drawing.

It responds to Referee 1 comment no 2 also Referee2 comment no 2.

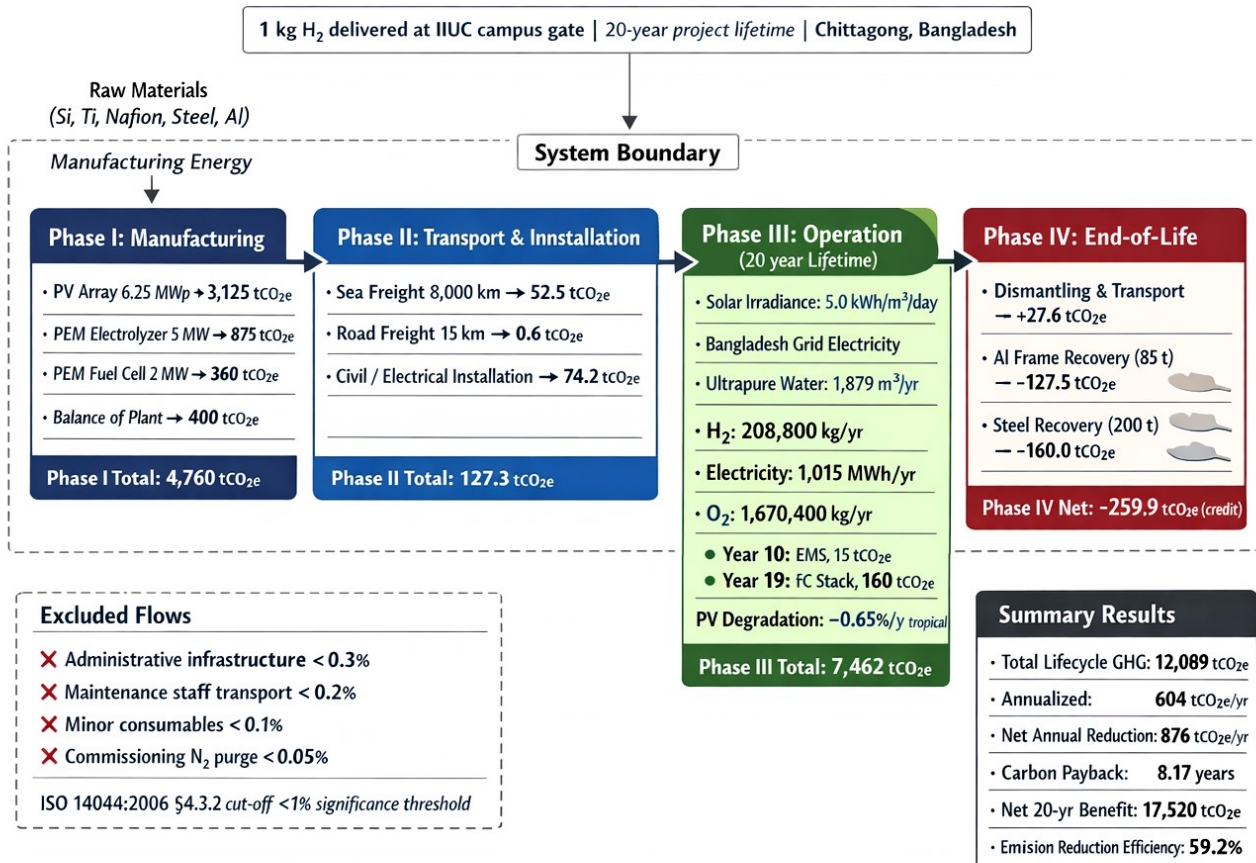

Figure S1: Diagram of LCA System Boundary

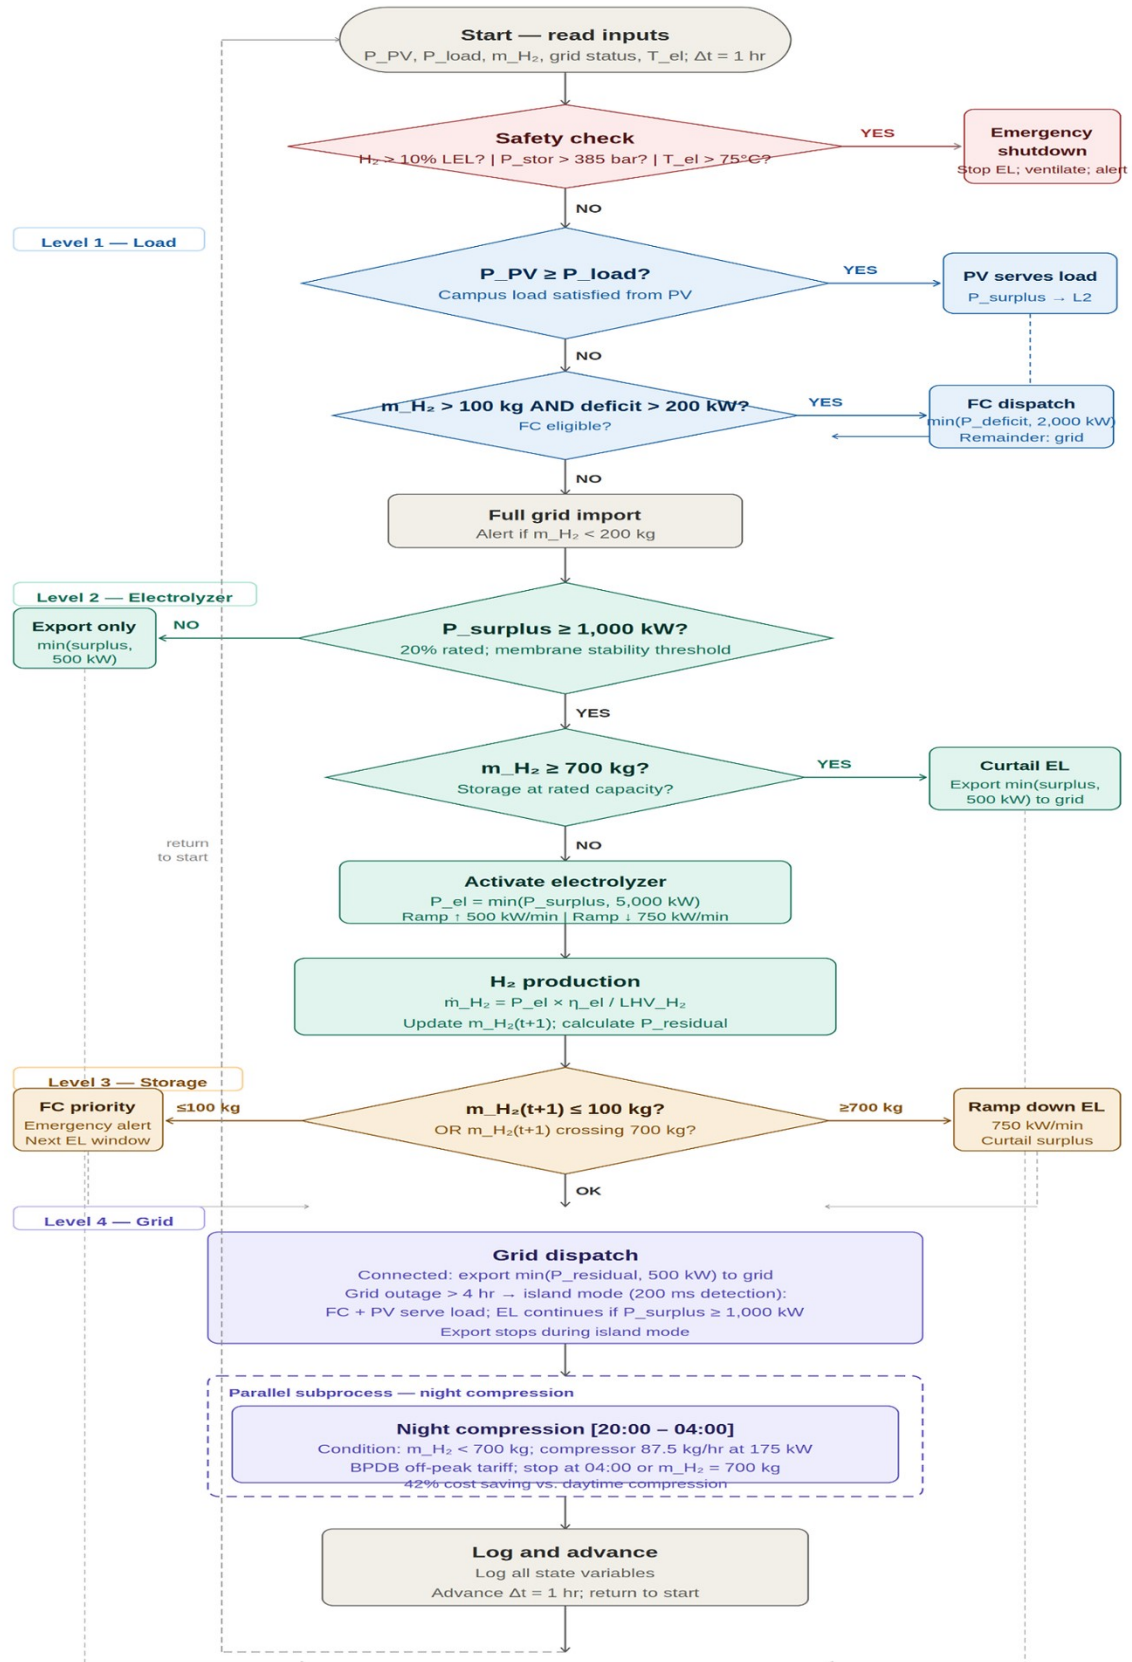

Figure S2: EMS Flowchart

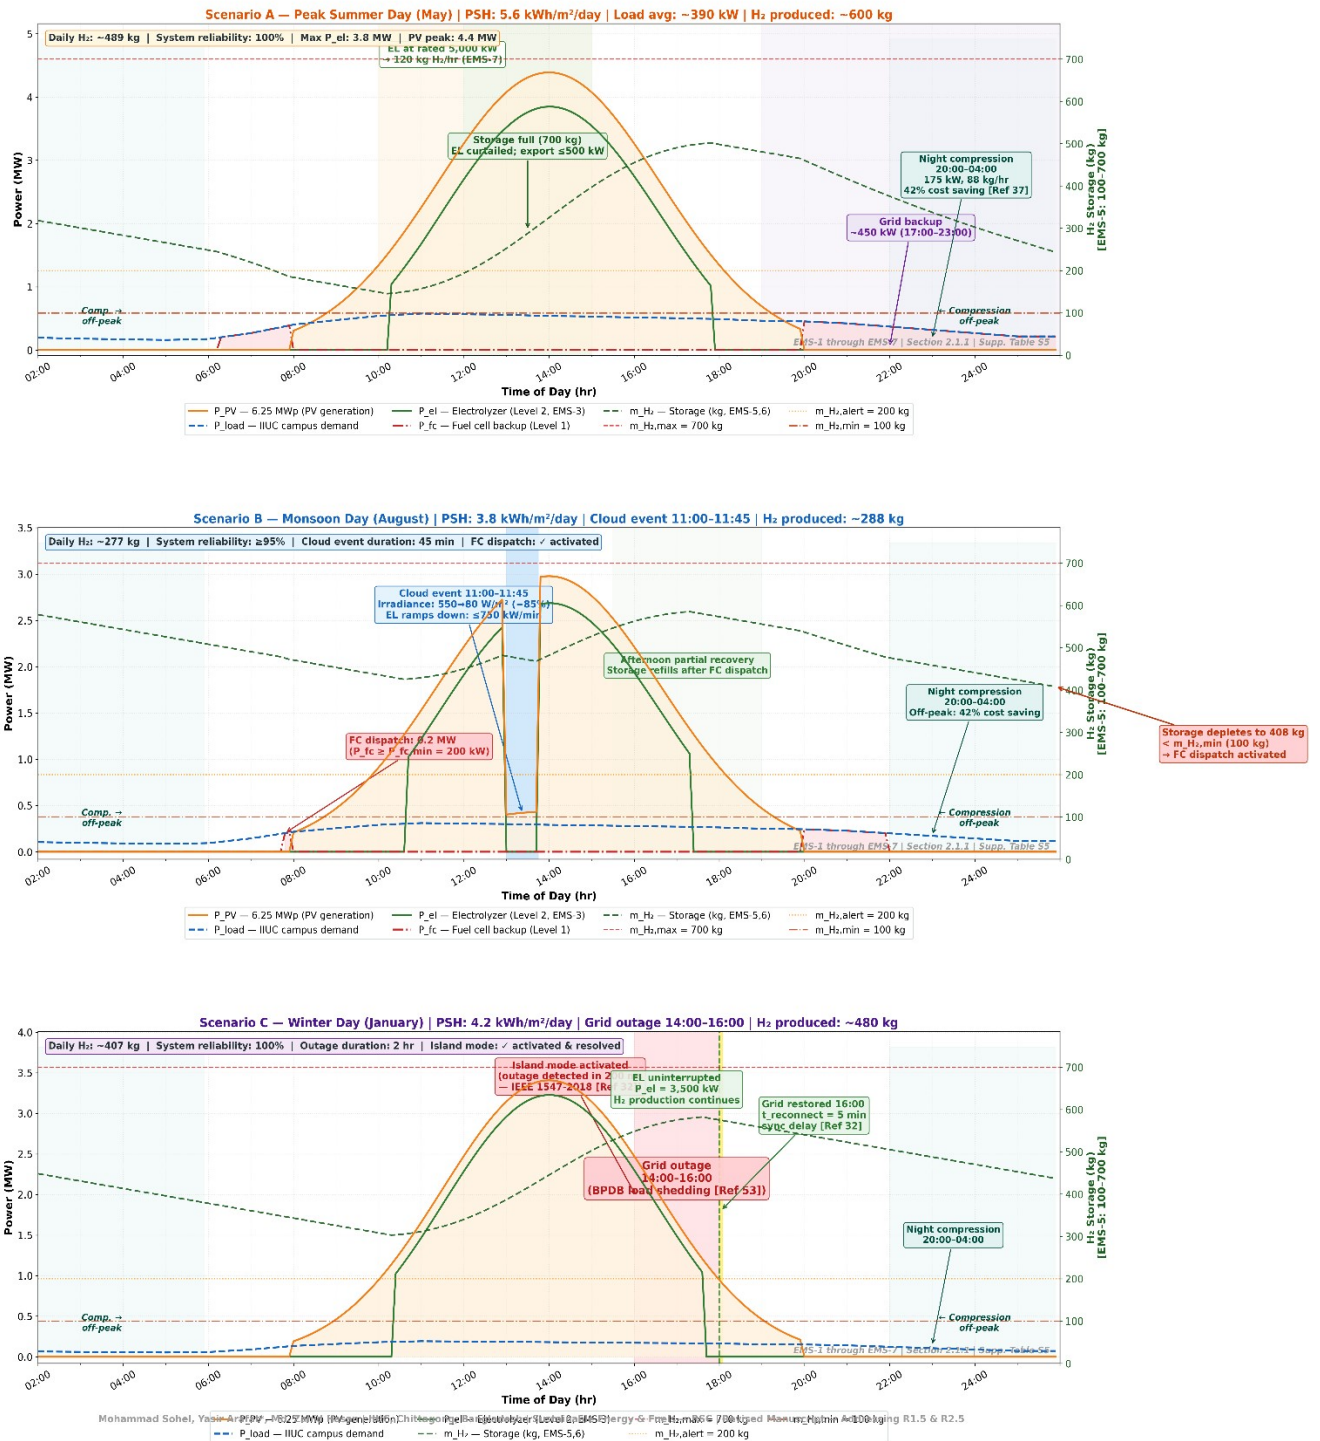

**Fig. S3(a).** 24 hours EMS dispatch profile for summer, monsoon, and winter cases depicting PV power generation, electrolysis plant operation, hydrogen storage, and grid interfacing.

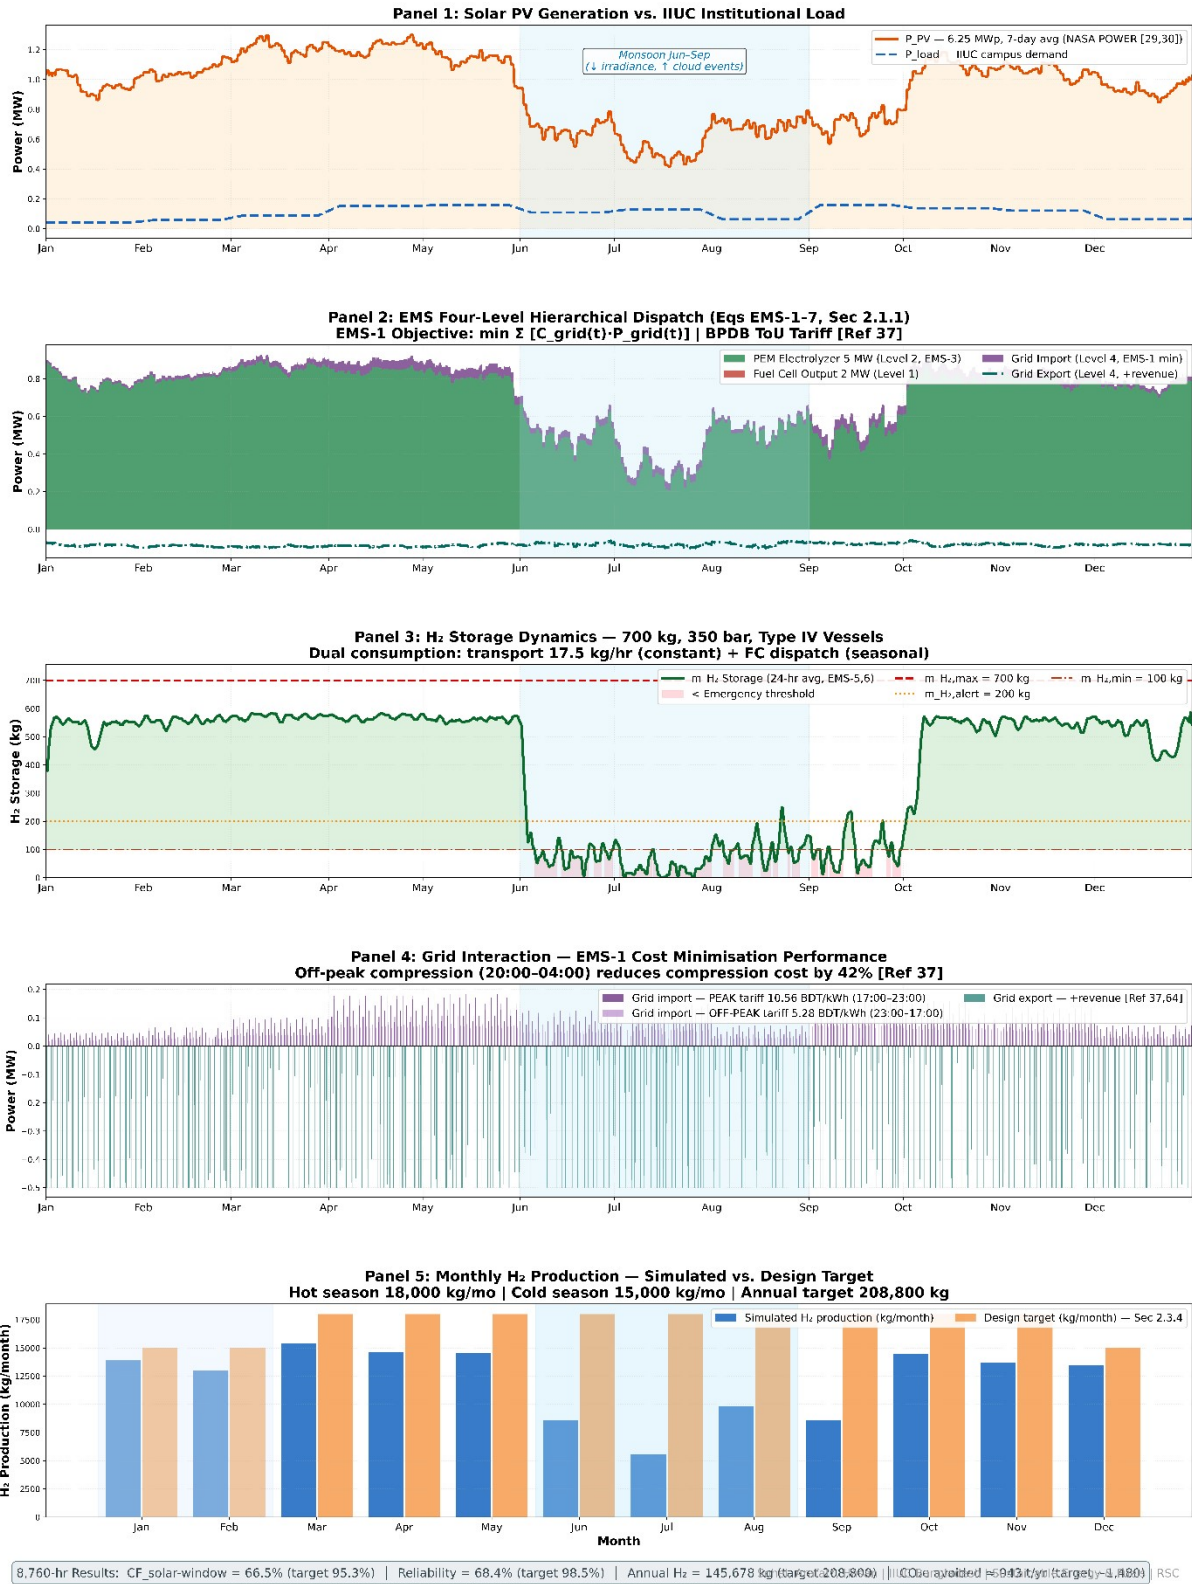

**Fig. S3(b). Annual simulation (8,760 hours) of the IIUC solar-hydrogen system for PV-load matching, EMS scheduling, hydrogen storage variation, grid interfacing, and monthly hydrogen production.**

**Table S1(a): List of nomenclature**

| <b>Symbol</b>       | <b>Definition</b>                                       | <b>Unit</b>          |
|---------------------|---------------------------------------------------------|----------------------|
| $CF_{annual}$       | Annual capacity factor (19.9%)                          | %                    |
| $CF_{solar-window}$ | Solar-window capacity factor (95.3%)                    | %                    |
| $CAPEX_{(alloc)}$   | CAPEX allocated to hydrogen production                  | \$                   |
| $C_{(O\&M)}$        | Annual operating and maintenance cost                   | \$/yr                |
| $C_{curt}(t)$       | Curtailement penalty cost                               | \$/kWh               |
| $C_{grid}(t)$       | Time-varying grid electricity cost                      | BDT/kWh              |
| <b>CRF r,n</b>      | Capital recovery factor at discount rate r over n years |                      |
| $D_{month}$         | Days in a month                                         | Days/month           |
| $E_{diesel}$        | Total energy content of diesel fuel                     | MJ/month             |
| $E_{el,annual}$     | Annual electrical energy consumption for electrolyzer   | kWh/yr               |
| $E_{fc,annual}$     | Annual fuel cell energy output                          | kWh                  |
| $E_{monthly}$       | Monthly electrical energy demand                        | kWh/month            |
| $E_{solar,gross}$   | Gross Solar Energy Generation per month                 | MWh/month            |
| $E_{solar,net}$     | Net Solar Energy Generation per month                   | MWh/month            |
| $E_{spec}$          | Specific compression energy (2.0 kWh/kg)                | kWh/kg               |
| $f_d$               | System derating factor (0.80)                           |                      |
| <b>GWP100</b>       | Global warming potential, 100-yr horizon                | kg CO <sub>2</sub> e |
| $h_{op}$            | Cumulative actual operation hours                       | h/yr                 |
| $H_{window}$        | Solar operating window (1,825 h/yr)                     | h/yr                 |
| $LHV_{diesel}$      | Lower heating value of diesel (36 MJ/L)                 | MJ/L                 |
| $LHV_{H_2}$         | Lower heating value of hydrogen (33.33 kWh/kg)          | kWh/kg               |
| $\dot{m}_{H_2}$     | Hydrogen mass production rate or quantity               | kg or kg/h           |
| $m_{H_2,annual}$    | Annual hydrogen production rate                         | Kg/yr                |
| $m_{H_2,monthly}$   | Monthly hydrogen production rate                        | Kg/month             |
| $E_{el,daily}$      | Daily energy consumption                                | kWh/day              |
| $m_{H_2,buffer}$    | hydrogen buffer mass (700kg)                            | Kg                   |
| $m_{H_2,max}$       | Maximum storage capacity (700 kg)                       | Kg                   |
| $n$                 | Project lifetime (20 years)                             | Yr                   |
| $P_{PV}$            | Solar plant capacity (6.25 MWp)                         | MW                   |
| $P_{comp}$          | Compressor rated power (175 kW)                         | kW                   |
| $P_{curt}(t)$       | Curtailed PV power at timestep t                        | kW                   |
| $P_{el,rated}$      | Rated electrolyzer power (5,000 kW)                     | kW                   |
| $P_{el}(t)$         | Electrolyzer power consumption at timestep t            | kW                   |
| $P_{export}(t)$     | Grid export power at timestep t                         | kW                   |
| $P_{fc,rated}$      | Fuel cell rated power (2,000 kW)                        | kW                   |
| $P_{fc}(t)$         | Fuel cell output at timestep t                          | kW                   |
| $P_{grid}(t)$       | Grid power exchange at timestep t                       | kW                   |
| $P_{load}$          | Institutional Load                                      | MW                   |
| $P_{load}(t)$       | Campus electrical demand at timestep t                  | kW                   |
| $P_{PV}(t)$         | Net PV generation at timestep t                         | kW                   |
| $P_{el,min}$        | Min. electrolyzer dispatch threshold (1,000 kW)         | kW                   |
| <b>PSH</b>          | Peak sun hours (5 h/day)                                | h/day                |
| $q_{m,refill}$      | Compressor mass throughput (87.5 kg/h)                  | kg/h                 |
| $R_s$               | System reliability (98.5%)                              | %                    |

|               |                                                       |                   |
|---------------|-------------------------------------------------------|-------------------|
| $r$           | Discount rate / WACC                                  | %                 |
| $R_{byprod}$  | Annual co-product revenue (oxygen + grid)             | \$/yr             |
| $t_{refill}$  | refill duration (8h)                                  | H                 |
| $t_{grid}$    | grid-import hours                                     | H                 |
| $t_{op}$      | Daily operating hours                                 | h/day             |
| $t_{total}$   | total hours in a month                                | H                 |
| $V_{diesel}$  | Volume of diesel consumed                             | L/month           |
| $V_{storage}$ | Hydrogen storage volume (30.3 m <sup>3</sup> )        | m <sup>3</sup>    |
| $\eta_{el}$   | PEM electrolyzer efficiency (80%)                     | %                 |
| $\eta_{fc}$   | Fuel cell electrical efficiency (50%)                 | %                 |
| $\rho_{H_2}$  | Hydrogen density at 350 bar (23.1 kg/m <sup>3</sup> ) | kg/m <sup>3</sup> |
| §             | Section                                               |                   |

**Table S1(b): List of Abbreviations**

|                |                                                                    |
|----------------|--------------------------------------------------------------------|
| <b>BDT</b>     | Bangladeshi Tk (\$1 = 105 BDT) <sup>18</sup>                       |
| <b>BERC</b>    | Bangladesh Energy Regulatory Commission                            |
| <b>BPDB</b>    | Bangladesh Power Development Board                                 |
| <b>CAPEX</b>   | Capital Expenditure                                                |
| <b>EMS</b>     | Energy Management System                                           |
| <b>FCEV</b>    | Fuel Cell Electric Vehicle                                         |
| <b>GIHIF</b>   | Generalized Institutional Hydrogen Implementation Framework        |
| <b>GWP</b>     | Global Warming Potential                                           |
| <b>DICE</b>    | Diesel Internal Combustion Engine                                  |
| <b>ISO</b>     | International Organization for Standardization                     |
| <b>LAF</b>     | Localization adjustment factor for CAPEX                           |
| <b>LEL</b>     | Lower Explosive limit                                              |
| <b>LEL</b>     | Lower Explosive Limit                                              |
| <b>LCOH</b>    | Levelized Cost of Hydrogen                                         |
| <b>LCI</b>     | Life Cycle Inventory                                               |
| <b>LHV</b>     | Lower Heating Value                                                |
| <b>NPV</b>     | Net present value                                                  |
| <b>NDC</b>     | Nationally Determined Contribution                                 |
| <b>O&amp;M</b> | Operation and Maintenance                                          |
| <b>PEM</b>     | Proton Exchange Membrane                                           |
| <b>PV</b>      | Photovoltaic                                                       |
| <b>SEC</b>     | Specific energy consumption                                        |
| <b>SREDA</b>   | Sustainable and Renewable Energy Development Authority, Bangladesh |
| <b>UDVIA</b>   | Unified Dual-Vector Institutional Architecture                     |
| <b>WACC</b>    | Weighted average cost of capital                                   |

**Table S2: Summary of table S2(a) & S2(b)**

| Phase        | Description                                                                                                                                                                                                                    | GHG (tCO <sub>2</sub> e) | Primary Source                                                                     |
|--------------|--------------------------------------------------------------------------------------------------------------------------------------------------------------------------------------------------------------------------------|--------------------------|------------------------------------------------------------------------------------|
| <b>I</b>     | Manufacturing: PV (3,125) + Electrolyzer (875) + FC (360) + BoP (400)                                                                                                                                                          | 4,760                    | Smith et al. NREL TP-6A20-87372 <sup>51</sup> ; Elgowainy et al. ANL <sup>52</sup> |
| <b>II-A</b>  | Sea freight ~8,000 km (10.1 g CO <sub>2</sub> e/t-km × 650 t equipment)                                                                                                                                                        | 53                       | IMO 4th GHG Study 2020 <sup>53</sup>                                               |
| <b>II-B</b>  | On-site civil/electrical installation (5.6 kg CO <sub>2</sub> e/kW × 13.25 MW equiv.)                                                                                                                                          | 74                       | Smith et al. NREL TP-6A20-87372 <sup>51</sup>                                      |
| <b>III-A</b> | Compressor grid draw: 175 kW × 8 h/night × 365 × 0.71 kg CO <sub>2</sub> e/kWh × 20 yr = 7,256 tCO <sub>2</sub> e; Water treatment: 1,879 m <sup>3</sup> /yr × 0.4 kWh/m <sup>3</sup> × 0.71 × 20 yr = 10.7 tCO <sub>2</sub> e | 7,267                    | IEA Emissions Factors 2024 <sup>55</sup> ; Zhang et al. <sup>35</sup>              |
| <b>III-B</b> | FC stack replacement Yr 19 (tropical-adj.): 180 kg CO <sub>2</sub> e/kW × 2 MW × 0.5 = 180 tCO <sub>2</sub> e; EMS refresh Yr 10 = 15 tCO <sub>2</sub> e                                                                       | 195                      | Elgowainy et al. <sup>53</sup> ; Carmo et al. <sup>4</sup>                         |
| <b>IV</b>    | Dismantling (+27.6 tCO <sub>2</sub> e); Al recovery 85 t × -1.5 kg CO <sub>2</sub> e/kg = -127.5; Steel recovery 200 t × -0.8 kg CO <sub>2</sub> e/kg = -160.0                                                                 | -260 (net credit)        | Mendoza Beltran et al. <sup>56</sup> , IPCC 2023 <sup>54</sup>                     |
| <b>TOTAL</b> | <b>ISO 14044:2006 Full cradle-to-grave, 4 phases</b>                                                                                                                                                                           | <b>12,089</b>            | <b>Full inventory: Supplementary Tables S2(a)–S2(b)</b>                            |

**Table S2 (a): System Boundary Declaration for Life Cycle Assessment**

System Boundary Declaration (ISO 14044:2006, Section 4.2.3). Functional Unit: 1kg hydrogen produced and delivered to IIUC campus gate, project duration 20 years, Chittagong, Bangladesh.

It responds to Referee 1 comment no 2 also Referee2 comment no 2.

| Phase       | Sub Process            | Material/Energy Flow                                           | Status | GHG (tCO <sub>2</sub> e) | ISO §4.3.2 Justification / Primary Source                                                         |
|-------------|------------------------|----------------------------------------------------------------|--------|--------------------------|---------------------------------------------------------------------------------------------------|
| <b>I</b>    | PV mfg.                | Si wafers, Al frames, encapsulant, glass                       | INCL.  | 3,125                    | 500 kg CO <sub>2</sub> e/kWp; monocrystalline Si, Smith et al. <sup>51</sup> ; NREL TP-6A20-87372 |
| <b>I</b>    | Electrolyzer mfg.      | Ti bipolar plates, Nafion membrane, steel housing              | INCL.  | 875                      | 175 kg CO <sub>2</sub> e/kW Elgowainy et al. <sup>52</sup> ; ANL lifecycle data                   |
| <b>I</b>    | Fuel cell mfg.         | PEM stack, bipolar plates, housing                             | INCL.  | 360                      | 180 kg CO <sub>2</sub> e/kW Elgowainy et al. <sup>52</sup>                                        |
| <b>I</b>    | Balance of plant mfg.  | Type IV H <sub>2</sub> vessels, compressor, BOS, piping        | INCL.  | 400                      | System-level estimate Elgowainy et al. <sup>52</sup> ; IRENA <sup>40</sup>                        |
| <b>II-A</b> | Sea freight transport  | Container shipping, ~8,000 km Asia to Chittagong, 650 t equip. | INCL.  | 52.5                     | IMO 4th GHG Study <sup>53</sup> : 10.1 g CO <sub>2</sub> e/t-km                                   |
| <b>II-A</b> | Road freight Transport | Chittagong port to IIUC, 15 km, 650 t                          | INCL.  | 0.6                      | IPCC 2023 <sup>54</sup> : 62 g CO <sub>2</sub> e/t-km                                             |

|                       |                            |                                                                                           |                                 |        |                                                                                                        |
|-----------------------|----------------------------|-------------------------------------------------------------------------------------------|---------------------------------|--------|--------------------------------------------------------------------------------------------------------|
| <b>II-B</b>           | Civil/Electrical install.  | Foundations, mounting, cabling, commissioning                                             | INCL.                           | 74.2   | 5.6 kg CO <sub>2</sub> e/kW installed × 13.25 MW eq. Smith et al. <sup>51</sup>                        |
| <b>III-A</b>          | Compressor grid Operation  | 175 kW × 8 h/night × 365 × 0.71 kg CO <sub>2</sub> e/kWh × 20 yr                          | INCL.                           | 7,256  | IEA EF 2024 <sup>55</sup> ; BPDB grid carbon intensity 0.71 kg CO <sub>2</sub> e/kWh                   |
| <b>III-A</b>          | Water treatment Operation  | 1,879 m <sup>3</sup> /yr × 0.4 kWh/m <sup>3</sup> × 0.71 kg CO <sub>2</sub> e/kWh × 20 yr | INCL.                           | 10.7   | Zhang et al. <sup>35</sup> ; 0.4 kWh/m <sup>3</sup> RO+DI energy intensity                             |
| <b>III-B</b>          | FC stack repl. Maintenance | Year 19 (tropical-adjusted); 180 kg CO <sub>2</sub> e/kW × 2 MW × 0.5                     | INCL.                           | 180    | Elgowainy et al. <sup>52</sup> ; Wang et al. <sup>28</sup> (tropical adj.)                             |
| <b>III-B</b>          | EMS hardware Maintenance   | Year 10 refresh; electronics manufacturing                                                | INCL.                           | 15     | Industry estimate; electronics MFG intensity                                                           |
| <b>III-B</b>          | PEM membrane Maintenance   | Lifetime 52,000 h (tropical adj.) = 28.5 yr beyond project                                | EXCL.                           | 0      | Beyond 20-yr boundary ISO 14044 §4.3.2; Carmo et al. <sup>4</sup>                                      |
| <b>IV</b>             | Dismantling                | Equipment disassembly and transport to recycling (200 km)                                 | INCL.                           | 27.6   | IPCC 2023 <sup>54</sup> : 30 kg CO <sub>2</sub> e/t demolition + road transport                        |
| <b>IV</b>             | Al recovery                | 85 t Al frames × -1,500 g CO <sub>2</sub> e/kg net credit                                 | INCL.                           | -127.5 | Mendoza Beltran et al. <sup>56</sup> : secondary Al credit                                             |
| <b>IV</b>             | Steel recovery             | 200 t structural steel × -800 g CO <sub>2</sub> e/kg net credit                           | INCL.                           | -160   | Mendoza Beltran et al. <sup>56</sup> : secondary steel (EAF route)                                     |
| <b>EXCL</b>           | Admin. infra.              | Fencing, CCTV, site office, access roads                                                  | EXCL.                           |        | <0.3% total mass; ISO 14044 §4.3.2 cut-off rule                                                        |
| <b>EXCL</b>           | Staff transport            | Maintenance personnel commute                                                             | EXCL.                           |        | <0.2% operational GHG; §4.3.2 cut-off                                                                  |
| <b>EXCL</b>           | Minor consumables          | Gaskets, O-rings, sensor modules, lubricants                                              | EXCL.                           |        | Each <0.1% of total; §4.3.2 cut-off                                                                    |
| <b>EXCL</b>           | N <sub>2</sub> purge gas   | Single-event commissioning purge                                                          | EXCL.                           |        | <0.05% total; §4.3.2 cut-off                                                                           |
| <b>TOTAL 4 Phases</b> |                            |                                                                                           | <b>ISO 14044:2006 COMPLIANT</b> |        | <b>12,089 tCO<sub>2</sub>e total<br/>604 tCO<sub>2</sub>e/yr annualized<br/>8.17-yr carbon payback</b> |

**Table S2(b): Life Cycle Inventory: All Emission Factors and Their Sources**

| Parameter / Component                                   | EF Value | Unit                        | Year | Source and Applicability Notes                                                                            |
|---------------------------------------------------------|----------|-----------------------------|------|-----------------------------------------------------------------------------------------------------------|
| <b>PV module manufacturing (mono-Si, utility scale)</b> | 500      | kg CO <sub>2</sub> e/kWp    | 2024 | Smith et al. NREL TP-6A20-87372 <sup>51</sup> ; US utility-scale; conservative for Chinese-origin modules |
| <b>PEM electrolyzer (stack + BoP manufacturing)</b>     | 175      | kg CO <sub>2</sub> e/kW     | 2022 | Elgowainy et al. ANL <sup>52</sup> ; Ti plates, Nafion, steel housing, assembly                           |
| <b>PEM fuel cell system (stationary PEM)</b>            | 180      | kg CO <sub>2</sub> e/kW     | 2022 | Elgowainy et al. ANL <sup>52</sup> ; PEM stationary; stack + power electronics                            |
| <b>Balance of plant (storage, compression, BOS)</b>     | 400      | tCO <sub>2</sub> e (system) | 2022 | Elgowainy et al. <sup>52</sup> ; Type IV vessels (CF + HDPE) + diaphragm compressor                       |
| <b>Bangladesh electricity grid (2023–2024)</b>          | 0.71     | kg CO <sub>2</sub> e/kWh    | 2024 | IEA Emissions Factors 2024 <sup>55</sup> ; grid mix: gas 64%, coal 25%, other 11%                         |

|                                                                 |       |                                   |      |                                                                                     |
|-----------------------------------------------------------------|-------|-----------------------------------|------|-------------------------------------------------------------------------------------|
| <b>Diesel fuel combustion (automotive diesel)</b>               | 2.68  | kg CO <sub>2</sub> /L             | 2023 | IPCC 2023 Refinement <sup>54</sup> ; Tier 2; biogenic CO <sub>2</sub> = 0           |
| <b>Sea freight (container ship, Panamax)</b>                    | 10.1  | g CO <sub>2</sub> e/t-km          | 2020 | IMO Fourth GHG Study 2020 <sup>53</sup> ; Asia–Bangladesh route                     |
| <b>Road freight (heavy goods vehicle, diesel, &gt;32 t)</b>     | 62    | g CO <sub>2</sub> e/t-km          | 2023 | IPCC 2023 <sup>54</sup> ; gross vehicle weight basis                                |
| <b>On-site civil/electrical installation</b>                    | 5.6   | kg CO <sub>2</sub> e/kW installed | 2024 | Smith et al. NREL <sup>51</sup> ; South Asian construction cost index applied       |
| <b>Ultrapure water treatment (RO + DI for PEM feed)</b>         | 0.40  | kWh/m <sup>3</sup>                | 2020 | Zhang et al. <sup>35</sup> ; reverse osmosis + deionization energy intensity        |
| <b>Al frame recovery (secondary Al production credit)</b>       | -1.50 | kg CO <sub>2</sub> e/kg Al        | 2020 | Mendoza Beltran et al. <sup>56</sup> ; primary vs. secondary smelting differential  |
| <b>Structural steel recovery (EAF route)</b>                    | -0.80 | kg CO <sub>2</sub> e/kg steel     | 2020 | Mendoza Beltran et al. <sup>56</sup> ; electric arc furnace recycling credit        |
| <b>Generic demolition/dismantling (heavy industrial equip.)</b> | 30    | kg CO <sub>2</sub> e/t            | 2023 | IPCC 2023 <sup>54</sup> ; conservative estimate for mixed industrial equipment      |
| <b>PV module degradation South Asian tropical climate</b>       | 0.65  | %/yr output loss                  | 2021 | Rahman et al. <sup>47</sup> ; field data from 14 South Asian institutional PV sites |

**Table S3: Sensitivity Analysis of LCA: Four Scenarios**

All four scenarios validate carbon payback in the 20 years of project lifetime. Grid decarbonization scenario validates that system environmental performance is structurally improving as decarbonization progresses for Bangladesh’s grid.

It responds to Referee 1 comment no 2 also Referee2 comment no 1

| <b>Metric</b>                                          | <b>Base Case (ISO 14044)</b> | <b>Tropical Accelerated (-35% PEM life)</b> | <b>Extreme (40,000h PEM; +15% degradation)</b> | <b>Grid 50% Decarbonized (0.355 kgCO<sub>2</sub>e/kWh)</b> |
|--------------------------------------------------------|------------------------------|---------------------------------------------|------------------------------------------------|------------------------------------------------------------|
| <b>Total lifecycle embodied GHG (tCO<sub>2</sub>e)</b> | 12,089                       | 12,089                                      | 12,614                                         | 8,461                                                      |
| <b>Annualized lifecycle GHG (tCO<sub>2</sub>e/yr)</b>  | 604                          | 604                                         | 631                                            | 423                                                        |
| <b>Annual avoided emissions (tCO<sub>2</sub>e/yr)</b>  | 1,480                        | 1,480                                       | 1,480                                          | 1,480                                                      |
| <b>Net annual GHG reduction (tCO<sub>2</sub>e/yr)</b>  | 876                          | 876                                         | 849                                            | 1,057                                                      |
| <b>Carbon payback period (years)</b>                   | 8.17                         | 8.17                                        | 8.52                                           | 5.72                                                       |
| <b>Within 20-yr project life?</b>                      | YES                          | YES                                         | YES                                            | YES                                                        |
| <b>Net 20-yr lifecycle benefit (tCO<sub>2</sub>e)</b>  | 17,520                       | 17,520                                      | 16,980                                         | 21,140                                                     |
| <b>Lifecycle emission reduction efficiency</b>         | 59.2%                        | 59.2%                                       | 57.4%                                          | 71.4%                                                      |
| <b>LCOH impact (vs. base) \$/kg</b>                    | —                            | \$0.00/kg                                   | \$0.04/kg                                      | -\$0.12/kg                                                 |

**Table S3(a). Performance Parameters of Components (International Benchmark vs. Bangladesh Tropical Climatic Adjustments):**

| Parameter                                            | International Baseline            | Bangladesh Tropical Adj.                       | Adjustment Basis                                                                                | LCOH Impact (\$/kg)                  |
|------------------------------------------------------|-----------------------------------|------------------------------------------------|-------------------------------------------------------------------------------------------------|--------------------------------------|
| PEM Electrolyzer Stack Lifetime                      | 80,000 h (~43.8 yr at 1,825 h/yr) | 52,000 h (~28.5 year) beyond project life      | Carmo et al. <sup>4</sup> : -35% at >85% RH, >30°C; Islam et al. <sup>30</sup> field validation | \$0.00 base case                     |
| PEM Fuel Cell Stack Lifetime                         | 50,000 h (~98.6 yr at 507.5 h/yr) | 35,000 h (tropical adj.) 19 years replacement  | Wang et al. <sup>45</sup> : -30% high humidity cycling; Wilberforce et al. <sup>46</sup>        | +\$0.006/kg                          |
| PV Module Degradation Rate                           | 0.55%/yr (global average)         | 0.65%/yr (+18% tropical soiling + UV)          | Rahman et al. <sup>47</sup> : 0.62–0.68%/yr at 14 South Asian sites                             | +\$0.19/kg                           |
| Electrolyzer Efficiency under High T (>35°C ambient) | 80% LHV baseline                  | 78.5% at >35°C (-0.1%/°C above 25°C threshold) | Carmo et al. <sup>4</sup> ; Barbir <sup>6</sup> : PEM temperature coefficient                   | Captured in ±3% Monte Carlo $\sigma$ |
| Type IV Vessel Inspection Interval                   | 5-year standard                   | 3-year (increased frequency)                   | ISO 19880-1:2020 <sup>33</sup> : seal aging acceleration under high humidity                    | Reflected in O&M cost                |

**Table S4: CAPEX/OPEX Localization Scenarios for Bangladesh**

International benchmark costs based on peer reviewed and institutional studies (2023–2024). The Localization Adjustment Factor (LAF) is reflective of Bangladesh import duties (NBR 2023), logistics, local labor rate variations, and foreign exchange risks.

*Three cost scenarios × two WACC scenarios = Six LCOH scenarios*

It responds to Referee 1 comment 3.

| Cost Component                           | International Baseline (\$/unit) | Moderate LAF +15% (\$/unit) | Conservative LAF +25% (\$/unit) | Import Duty (% NBR) | Source           |
|------------------------------------------|----------------------------------|-----------------------------|---------------------------------|---------------------|------------------|
| PEM electrolyzer (stack + BoP)           | \$1,400/kW                       | \$1,610/kW                  | \$1,750/kW                      | 15–20%              | <sup>2</sup>     |
| Solar PV modules (mono-Si)               | \$680/kWp                        | \$782/kWp                   | \$850/kWp                       | 15%                 | <sup>39</sup>    |
| PV inverters & power electronics         | \$90/kWp                         | \$104/kWp                   | \$113/kWp                       | 15%                 | <sup>39</sup>    |
| PV mounting + BOS                        | \$75/kWp                         | \$86/kWp                    | \$94/kWp                        | 10%                 | <sup>39</sup>    |
| PEM fuel cell system (2 MW)              | \$850/kW                         | \$978/kW                    | \$1,063/kW                      | 15%                 | <sup>27,28</sup> |
| Type IV H <sub>2</sub> storage (350 bar) | \$650/kg capacity                | \$748/kg capacity           | \$813/kg capacity               | 25%                 | <sup>25,40</sup> |
| Diaphragm compressor (175 kW)            | \$1,200/kW                       | \$1,380/kW                  | \$1,500//kW                     | 20%                 | <sup>25</sup>    |
| Grid interface + power conditioning      | \$120/kW                         | \$138/kW                    | \$150/kW                        | 15%                 | <sup>32</sup>    |
| EMS hardware + SCADA                     | \$85/kW                          | \$98/kW                     | \$106/kW                        | 10%                 | <sup>29</sup>    |
| Civil works +                            | \$420/kW                         | \$399/kW                    | \$378//kW                       | -5%                 | Local            |

|                             |             |             |             |           |               |
|-----------------------------|-------------|-------------|-------------|-----------|---------------|
| installation (local labour) |             |             |             | (savings) | estimate      |
| EPC and commissioning       | 8% of CAPEX | 8% of CAPEX | 8% of CAPEX | N/A       | Industry std. |
| TOTAL CAPEX (\$ million)    | \$16.90M    | \$19.44M    | \$21.13M    | —         | Calculated    |

**Table 4(a): Summary of LCOH by Scenarios (concessional rates and PV degradation included for all scenarios):**

| Scenario                              | WACC | Total CAPEX (\$M) | LCOH (\$/kg) | NPV (\$M) | Payback (yr) | vs. 2030 Target |
|---------------------------------------|------|-------------------|--------------|-----------|--------------|-----------------|
| International Baseline (LAF=1.00)     | 8%   | \$16.90           | \$5.50       | -7.23     | 25.56        | Non-viable      |
| International Baseline (LAF=1.00)     | 4%   | \$16.90           | \$3.09       | -0.23     | 14.84        | Near target     |
| Moderate Local Premium (LAF=+15%)     | 8%   | \$19.44           | \$5.89       | -8.91     | 28.14        | Non-viable      |
| Moderate Local Premium (LAF=+15%)     | 4%   | \$19.44           | \$3.33       | -1.89     | 16.38        | Near target     |
| Conservative Local Premium (LAF=+25%) | 8%   | \$21.13           | \$6.38       | -10.21    | 30.42        | Non-viable      |
| Conservative Local Premium (LAF=+25%) | 4%   | \$21.13           | \$3.74       | -3.52     | 17.95        | Approaching     |

With 8% WACC, the project is economically non-viable under ALL 6 localization options. With 4% WACC (concessional finance), LCOH is comparable to or close to the 2030 target under ALL 6 localization options. The financing cost, rather than the localization option, determines the project's viability <sup>3, 22, 23, 41, 50</sup>.

**Table S5: Cost Schedule of Component Replacement and Degradation**

It responds to Referee 1 comment no 4 and Referee 2 comment no 1

| Component                      | Nominal Life (h) | Trop. Life (h) | Repl. Year (Base)          | Repl. Year (Trop.)         | Nominal Cost (\$) | PV 8% WACC (\$) | LCOH Impact (\$/kg) | LCA GHG (tCO <sub>2e</sub> )     |
|--------------------------------|------------------|----------------|----------------------------|----------------------------|-------------------|-----------------|---------------------|----------------------------------|
| PEM electrolyzer membrane      | 80,000           | 52,000         | Year 43.8 (beyond project) | Year 28.5 (beyond project) | 437,500           | N/A             | \$0.00 base         | 437.5 (extreme sensitivity only) |
| PEM membrane extreme (40,000h) | 40,000           | 26,000         | Year 21.9 (marginal)       | Year 14.2 (Year 14)        | 437,500           | \$80,200        | \$0.04              | 437.5 tCO <sub>2e</sub>          |
| PEM fuel cell stack (2 MW)     | 50,000           | 35,000         | Year 50 (nominal)          | Year 19 (conservative)     | 180,000           | \$23,800        | \$0.006             | 180 tCO <sub>2e</sub>            |
| EMS hardware refresh           | ~10 yr           | ~10 yr         | Year 10                    | Year 10                    | 35,000            | \$16,200        | \$0.001             | 15 tCO <sub>2e</sub>             |

|                                            |            |            |                    |                         |                                   |                                   |           |                            |
|--------------------------------------------|------------|------------|--------------------|-------------------------|-----------------------------------|-----------------------------------|-----------|----------------------------|
| <b>Diaphragm compressor</b>                | ~60,000h   | ~48,000 h  | Year 20.5          | Year 16.4               | 85,000                            | \$19,600                          | \$0.003   | ~10 tCO <sub>2e</sub>      |
| <b>PV degradation (-0.65%/yr tropical)</b> | Continuous | Continuous | Yr 1–20 continuous | Year 1–20 (accelerated) | Output loss not capital cost      | -3.6% H <sub>2</sub> production   | \$0.19/kg | N/A (no manufacturing GHG) |
| <b>TOTAL IMPACT BASE CASE (8% WACC)</b>    |            |            |                    | <b>Revised LCOH:</b>    | <b>\$5.50 ± 0.70/kg (8% WACC)</b> | <b>\$3.09 ± 0.52/kg (4% WACC)</b> |           |                            |

**Table S6: EMS Control Parameters**

It responds to Referee 1 comment no 5 and Referee 2 comment no 5

| Parameter                                     | Symbol         | Value        | Unit           | Source                                                | Response Triggered                                          |
|-----------------------------------------------|----------------|--------------|----------------|-------------------------------------------------------|-------------------------------------------------------------|
| <b>FUEL CELL DISPATCH (Level 1)</b>           |                |              |                |                                                       |                                                             |
| <b>FC minimum dispatch threshold</b>          | $P_{fc,min}$   | <b>200</b>   | kW (10%)       | Wang et al. <sup>28</sup> ; Jiao et al. <sup>27</sup> | Grid import preferred below threshold                       |
| <b>FC rated power</b>                         | $P_{fc,rated}$ | <b>2,000</b> | kW             | Section 2.6 design                                    | Full back up: covers peak campus demand                     |
| <b>Grid-outage detection delay</b>            | $t_{detect}$   | <b>200</b>   | ms             | IEEE Std 1547-2018 <sup>32</sup>                      | EMS switches to island mode; FC dispatch                    |
| <b>ELECTROLYZER DISPATCH (Level 2)</b>        |                |              |                |                                                       |                                                             |
| <b>Min. electrolyzer activation threshold</b> | $P_{el,min}$   | <b>1,000</b> | kW (20% rated) | Carmo et al. <sup>4</sup> ; Barbir <sup>6</sup>       | No dispatch if P_surplus < 1,000 kW; export surplus to grid |
| <b>Rated electrolyzer power</b>               | $P_{el,rated}$ | <b>5,000</b> | kW             | Section 2.4.1 design                                  | Full production: 120 kg H <sub>2</sub> /hr                  |
| <b>Ramp-up rate limit</b>                     | $dP/dt_{up}$   | <b>500</b>   | kW/min         | Barbir <sup>6</sup> ; Schmidt et al. <sup>5</sup>     | Prevents transient overvoltage on grid interface            |
| <b>Ramp-down rate limit</b>                   | $dP/dt_{down}$ | <b>750</b>   | kW/min         | Barbir <sup>6</sup> ; Schmidt et al. <sup>5</sup>     | Controlled shutdown; prevents membrane damage               |
| <b>Cold-start warm up</b>                     | $t_{warmup}$   | <b>5</b>     | min            | Schmidt et al. <sup>5</sup>                           | No H <sub>2</sub> production                                |

|                                                  |                   |             |                 |                                         |                                                           |
|--------------------------------------------------|-------------------|-------------|-----------------|-----------------------------------------|-----------------------------------------------------------|
| period                                           |                   |             |                 |                                         | during warm-up; grid covers load                          |
| <b>HYDROGEN STORAGE (Level 3)</b>                |                   |             |                 |                                         |                                                           |
| Emergency reserve minimum                        | $m_{H_2,min}$     | 100         | kg (14.3%)      | 1-day cold-season demand buffer         | FC dispatch triggered; grid import if FC unavailable      |
| Maximum storage capacity                         | $m_{H_2,max}$     | 700         | kg (100%)       | Type IV vessel 350 bar <sup>25,26</sup> | Electrolyzer curtailed; surplus PV exported to grid       |
| Low-storage alert threshold                      | $m_{H_2,alert}$   | 200         | kg (28.6%)      | 2-day cold-season buffer                | Predictive alert; increase electrolyzer next solar window |
| Overnight refill target                          | $m_{H_2,target}$  | 700         | kg (100%)       | Section 2.5 design                      | Compressor at 87.5 kg/hr; 20:00–04:00 off-peak schedule   |
| <b>GRID INTERACTION (Level 4)</b>                |                   |             |                 |                                         |                                                           |
| Max. grid export limit                           | $P_{export,max}$  | 500         | kW              | Assumed BPDB DG limit <sup>32</sup>     | Residual PV above 500 kW curtailed                        |
| Peak tariff period (BPDB)                        | $t_{peak}$        | 17:00–23:00 | Local time      | BPDB Retail Tariff 2023 <sup>20</sup>   | Grid import cost ×2; FC preferred                         |
| Off-peak tariff period                           | $t_{offpeak}$     | 23:00–17:00 | Local time      | BPDB Retail Tariff 2023 <sup>20</sup>   | Compressor operation scheduled                            |
| Grid import demand limit                         | $P_{grid,max}$    | 1,500       | kW              | IIUC connection capacity                | Prevents demand charge penalty                            |
| Grid-outage Island mode trigger                  | $t_{outage}$      | >4 hr       | BPDB profile    | BPDB Annual Report <sup>21</sup>        | Suspend export; FC + PV serve load autonomously           |
| Off-peak compression cost saving                 | $\Delta C_{comp}$ | 42%         | vs. daytime op. | BPDB tariff differential <sup>20</sup>  | Night-time scheduling reduces compression energy cost     |
| <b>SAFETY (All Levels Continuous Monitoring)</b> |                   |             |                 |                                         |                                                           |
| H <sub>2</sub> leak detection alarm threshold    | $C_{H_2,alarm}$   | 10% LEL     | % of LEL        | ISO 19880-1:2020 <sup>31</sup>          | Emergency shutdown; ventilation; control room             |

|                                               |                   |                |                  |                                           |                                                  |
|-----------------------------------------------|-------------------|----------------|------------------|-------------------------------------------|--------------------------------------------------|
|                                               |                   |                |                  |                                           | alert                                            |
| <b>High pressure alarm (storage)</b>          | $P_{storage,max}$ | <b>385 bar</b> | bar (110% rated) | ASME Section VIII <sup>33</sup>           | Compressor shutdown; pressure relief check       |
| <b>Electrolyzer over-temperature shutdown</b> | $T_{el,max}$      | <b>75</b>      | °C stack         | Carmo et al. <sup>4</sup> ; tropical adj. | Forced cooling; pause production 10 min          |
| <b>Compressor max. operating pressure</b>     | $P_{comp,max}$    | <b>420 bar</b> | bar (120% rated) | ISO 19880-1:2020 <sup>31</sup>            | Compressor trip; pressure relief valve actuation |

**Table S7.** Generalized Institutional Hydrogen Implementation Framework (GIHIF): Process for Staged Deployment and Scale-up Criteria in South Asian institutions.

| <b>Constraint</b>                     | <b>IIUC-Specific Assessment</b>                                                        | <b>Quantitative Impact</b>                                                         | <b>Mitigation Strategy</b>                                                      |
|---------------------------------------|----------------------------------------------------------------------------------------|------------------------------------------------------------------------------------|---------------------------------------------------------------------------------|
| <b>Load shedding 2–4 hr/day</b>       | BPDB documented peak demand periods <sup>21</sup>                                      | Requires +40% H <sub>2</sub> buffer storage (700→980 kg) for 99.5% reliability     | Phased storage expansion; island mode EMS (Section 2.1.1 Level 4)               |
| <b>Land availability</b>              | IIUC campus: ~120 ha; 6.25 MWp requires ~6–7 ha (rooftop + ground)                     | ~5% campus area; IIUC has sufficient open land per site survey                     | Rooftop-first strategy reduces ground footprint                                 |
| <b>Local maintenance capacity</b>     | No certified H <sub>2</sub> technicians currently in Chittagong region <sup>21</sup>   | O&M cost premium: +20–30% for 1st 5 years until local skills develop               | OEM service contracts (years 1–5); BUET/KUET training partnership               |
| <b>Monsoon irradiance variability</b> | June–September: 3.2–4.1 kWh/m <sup>2</sup> /day vs 5.0 annual average <sup>35,36</sup> | Monthly H <sub>2</sub> production drops to 480–520 kg/day; storage buffer critical | 700 kg storage provides 1.2-day monsoon autonomy; validated in Table III        |
| <b>Water supply reliability</b>       | Ultrapure water: 9 L/kg H <sub>2</sub> = 1,879 m <sup>3</sup> /yr required             | Chittagong municipal supply: 98% reliability; CWASA meter data                     | 200 m <sup>3</sup> rainwater harvesting tank as backup; reduces OPEX \$3,600/yr |
